# Supplementary material for: ZNF750 Is Expressed in Differentiated Keratinocytes and Regulates Epidermal Late Differentiation Genes
Source: PubMed Central journal article supplement (PMC3427353; doi:10.1371/journal.pone.0042628), 2012-08-24
Supplement: pone.0042628.s003.pdf [file pone.0042628.s003.pdf]

**Table S3. shRNA sequences used for *ZNF750* silencing.**

| <b>shRNA</b>   | <b>Sequence</b>                                                       |
|----------------|-----------------------------------------------------------------------|
| ZNF750 shRNA-a | 5' CCGGGAAAGCCCTTCAAGTATAAATCTCGAGATTTATACTTGAAG<br>GGCTTTCTTTTGG 3'  |
| ZNF750 shRNA-b | 5' CCGGATTACTGGTGAAGGTATTATCCTCGAGGATAATACCTTCAC<br>CAGTAATTTTGG 3'   |
| ZNF750 shRNA-c | 5' CCGGGAGTTCCCAAGTGCCCTAAATCTCGAGATTTAGGGCACTTG<br>GGA ACTCTTTTGG 3' |
