# Supplementary material for: ZNF750 Is Expressed in Differentiated Keratinocytes and Regulates Epidermal Late Differentiation Genes
Source: PLoS One. 2012 Aug 24;7(8):e42628. doi: 10.1371/journal.pone.0042628 (PMC3427353; doi:10.1371/journal.pone.0042628)
Supplement: Table S2 — Gene Ontology terms of selected ZNF750 target genes that were downregulated by ZNF750 silencing. (PDF) [file pone.0042628.s002.pdf]

**Table S2. Gene Ontology terms of selected ZNF750 target genes that were downregulated by ZNF750 silencing.**

| <b>Symbol</b>  | <b>Gene Name</b>                                     | <b>Fold Change</b> | <b>Gene Ontology term</b>       |
|----------------|------------------------------------------------------|--------------------|---------------------------------|
| <i>CSTA</i>    | cystatin A (stefin A)                                | -4.40697           | Cornified Envelope              |
| <i>FLG</i>     | filaggrin                                            | -14.4208           | Cornified Envelope              |
| <i>HRNR</i>    | hornerin                                             | -35.1653           | Cornified Envelope              |
| <i>RPTN</i>    | repetin                                              | -37.029            | Cornified Envelope              |
| <i>SCEL</i>    | sciellin                                             | -2.60339           | Cornified Envelope              |
| <i>SPRR1A</i>  | small proline-rich protein 1A                        | -14.1643           | Cornified Envelope              |
| <i>SPRR1B</i>  | small proline-rich protein 1B (cornifin)             | -4.37015           | Cornified Envelope              |
| <i>SPRR2A</i>  | small proline-rich protein 2A                        | -4.50311           | Cornified Envelope              |
| <i>SPRR2E</i>  | small proline-rich protein 2E                        | -3.90093           | Cornified Envelope              |
| <i>SPRR3</i>   | small proline-rich protein 3                         | -27.6549           | Keratinocyte Differentiation    |
| <i>LCE3D</i>   | late cornified envelope 3D                           | -2.19341           | Keratinocyte Differentiation    |
| <i>KRT2</i>    | keratin 2                                            | -3.38804           | Keratinocyte Differentiation    |
| <i>S100A7</i>  | S100 calcium binding protein A7                      | -13.66             | Keratinocyte Differentiation    |
| <i>ALOX12B</i> | arachidonate 12-lipoxygenase, 12R type               | -3.40385           | Epidermis Development           |
| <i>CALML5</i>  | calmodulin-like 5                                    | -6.46431           | Epidermis Development           |
| <i>CASP14</i>  | caspase 14, apoptosis-related cysteine peptidase     | -22.7243           | Epidermis Development           |
| <i>FABP5</i>   | fatty acid binding protein 5 (psoriasis-associated)  | -7.21701           | Epidermis Development           |
| <i>KLK14</i>   | kallikrein-related peptidase 14                      | -2.036             | Epidermis Development           |
| <i>KRT1</i>    | keratin 1                                            | -5.00053           | Epidermis Development           |
| <i>KRT10</i>   | keratin 10                                           | -2.42125           | Epidermis Development           |
| <i>KRT16</i>   | keratin 16                                           | -2.56328           | Epidermis Development           |
| <i>SPINK5</i>  | serine peptidase inhibitor, Kazal type 5             | -19.5388           | Epidermis Development           |
| <i>TGM5</i>    | transglutaminase 5                                   | -6.1669            | Epidermis Development           |
| <i>DLX5</i>    | distal-less homeobox 5                               | -2.95434           | Epithelial cell Differentiation |
| <i>UPK2</i>    | uroplakin 2                                          | -2.2658            | Epithelial cell Differentiation |
| <i>KRT3</i>    | keratin 3                                            | -4.64879           | Epithelial Development          |
| <i>WNT4</i>    | wingless-type MMTV integration site family, member 4 | -2.04847           | Epithelial Development          |
