# Supplementary material for: ZNF750 Is Expressed in Differentiated Keratinocytes and Regulates Epidermal Late Differentiation Genes
Source: PLoS One. 2012 Aug 24;7(8):e42628. doi: 10.1371/journal.pone.0042628 (PMC3427353; doi:10.1371/journal.pone.0042628)
Supplement: Table S4 — Oligonucleotide sequences used in quantitative real-time PCR. (PDF) [file pone.0042628.s004.pdf]

**Table S4. Oligonucleotide sequences used in quantitative real-time PCR.**

| <b>Gene Symbol</b>            | <b>Forward primer</b>     | <b>Reverse primer</b>     |
|-------------------------------|---------------------------|---------------------------|
| <i>DSG1</i>                   | ATCCAGCAGAGATGGACTGG      | GTTTCTGCCTTCGGATTGAA      |
| <i>FLG</i>                    | GGCAAATCCTGAAGAATCCA      | TGCTTTCTGTGCTTGTGTCC      |
| <i>GAPDH</i>                  | TCGACAGTCAGCCGCATC        | CCGTTGACTCCGACCTTC        |
| <i>IVL</i>                    | TCTGCCTCAGCCTTACTGTG      | CAGTGGAGTTGGCTGTTTCA      |
| <i>KRT1</i>                   | TCTCGGTTGGATTTCGGAAGTGAAG | AGACAACCTCTGCTTGGTAGAGTGC |
| <i>LCE1C</i>                  | GCTGAAGGACCCTGTGCTG       | ACACTTTGGGGGACACTTTG      |
| <i>LCE2B</i>                  | GGTTGACTAAACTCTGCCAGG     | CACTGGGGCAGGCATTTA        |
| <i>LCE3D</i>                  | CCTTCTCCTGCCTCCTCTG       | CACTTGGGTGAGGGACACTT      |
| <i>LOR</i>                    | GAGTAGCCGCAGCCAGAAC       | CTCCTCACTCACCTTCCTG       |
| <i>SPINK5</i>                 | GACATCTAAGAGTACAGCTTCCTT  | TGTTGCCATGCATTTTCCCATCTG  |
| <i>SPRR1A</i>                 | GACCACACAGCCCATTTCTG      | CTCCTTGGTTTTGGGGATG       |
| <i>SPRR3</i>                  | GCTGAACACCTCGACCTTCT      | TTCAAAGGATGCTGGACACA      |
| <i>ZNF750</i><br>(endogenous) | CAGGTACTGCTTCCTGAGCAC     | GAGAGCCTCCGTCATCTGG       |
| <i>ZNF750 Exon2-3</i>         | GCCTTCAGGCCTGTTAAGAA      | GGCTGCCAGGTTTATCTCTG      |
